# Supplementary material for: Reduction of Circulating Neutrophils Precedes and Accompanies Type 1 Diabetes
Source: PubMed Central journal article supplement — Diabetes. 2013 May 17;62(6):2072–7. doi: 10.2337/db12-1345 (PMC3661622; doi:10.2337/db12-1345), 2013-05-17

SUPPLEMENTARY DATA

**Supplementary Table 1.** *Anti human-neutrophils Ab directed towards anti-neutrophil cytoplasmic antibodies (both pANCA and cANCA) or surface neutrophil antigens (anti-HNA). The number of donors tested are listed and the samples positive are shown in parenthesis.*

|                                  | healthy controls | relatives autoAb <sup>NEG</sup> | relatives autoAb <sup>POS</sup> | T1D at onset | T1D 1 year | T1D long-term |
|----------------------------------|------------------|---------------------------------|---------------------------------|--------------|------------|---------------|
| <b>Anti-ANCA</b><br>tested (pos) | 23 (0)           | 17 (0)                          | 12 (0)                          | 23 (1)       | 17 (1)     | 13 (0)        |
| <b>Anti-HNA</b><br>tested (pos)  | 5 (0)            | 14 (2)                          | 5 (0)                           | 6 (0)        |            |               |

**Supplementary Table 2.** Characteristics of subjects included in the analysis.\* Age is presented as median with interquartile range (25th percentile – 75th percentile) in parentheses.

| <b>ADULT POPULATION</b> | <b>T1D at onset (n=32)</b> | <b>T1D 1-5 yrs (n=24)</b> | <b>T1D &gt;5 yrs (n=78)</b> | <b>healthy controls (n=40)</b> |
|-------------------------|----------------------------|---------------------------|-----------------------------|--------------------------------|
| Age, years*             | 30<br>(25-35)              | 33<br>(28-37)             | 42<br>(24-51)               | 34<br>(27-39)                  |
| Sex<br>(% females)      | 34%                        | 54%                       | 51%                         | 47%                            |

SUPPLEMENTARY DATA

**Supplementary Figure 1.** The neutrophil counts were determined by the automated haematology analyzer at the Siena University Hospital on blood collected from: patients within 1 week from diagnosis of T1D (all patients were positive for at least one T1D-associated autoantibody: anti-GAD, anti-IA-2, anti-ZnT8); patients with T1D and a disease duration >1 and <5 years; patients with T1D and a disease duration >5 years; and non-diabetic control individuals with no family history for T1D recruited among blood donors at Immunohematology Unit of the Siena University Hospital. Patient characteristics are described in the table below. Stars indicate values significantly different as compared to those in healthy controls (\*\* p=0.0003; \*\*\* p< 0.0001; \* p=0.03).

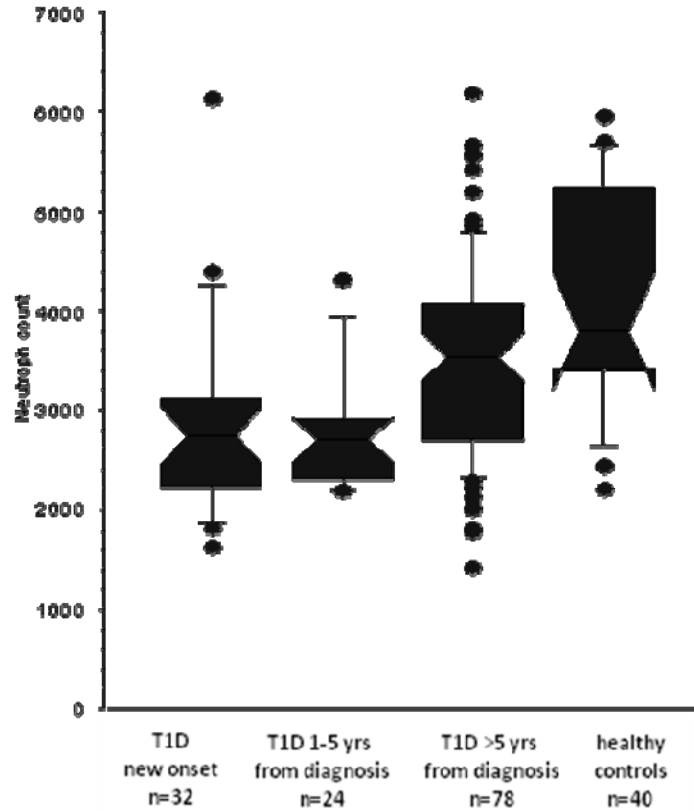

SUPPLEMENTARY DATA

**Supplementary Figure 2.** (A) The frequency of immature neutrophils (i.e., banded cells CD10<sup>-</sup>) was determined by flow-cytometry on fresh total blood upon gating on CD3-CD14-CD11b+CD16+CD49d<sup>-</sup> cells. (B) Mean fluorescence intensity of CD11b and CD16 on mature neutrophils (i.e., segmented cells CD10<sup>+</sup>) was determined by flow-cytometry on fresh total blood upon gating on CD3-CD14-CD11b+CD16+CD49d<sup>-</sup> cells. Each dot represents one donor.

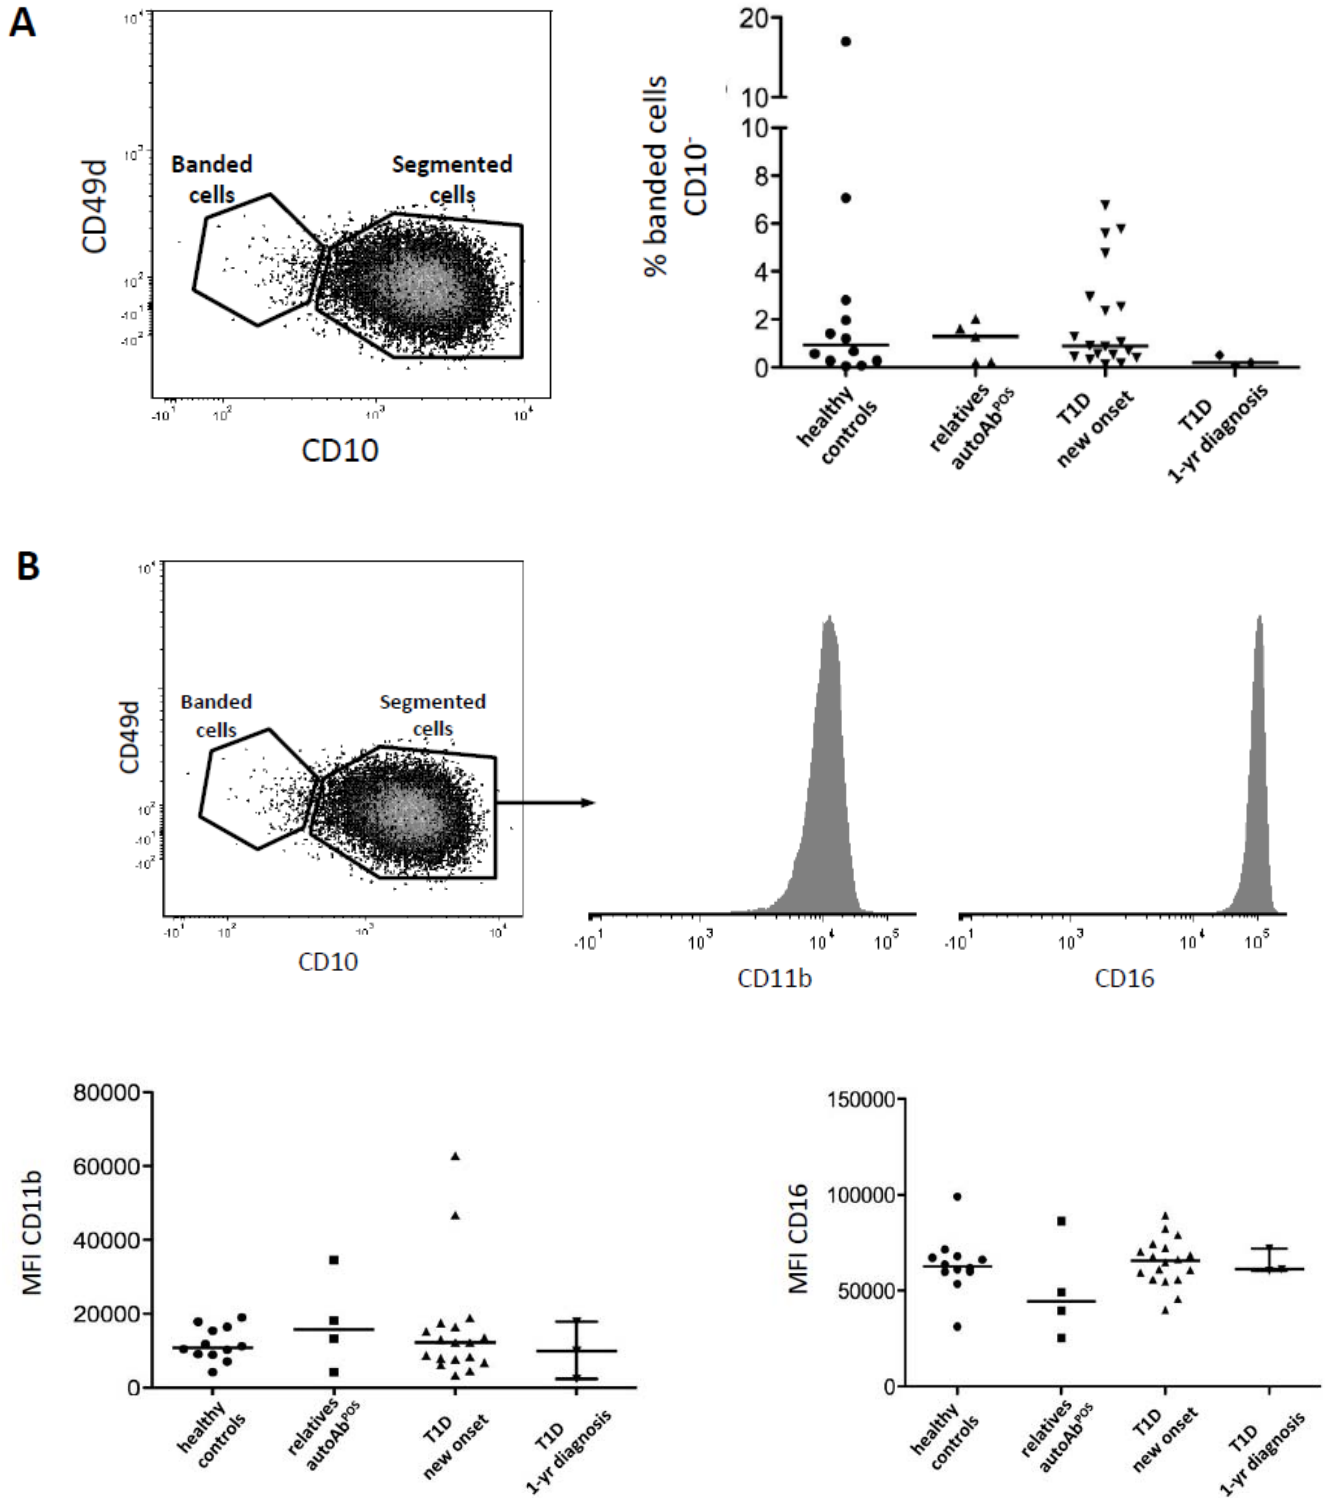

Supplement: supp_db12-1345_DB121345SupplementaryData.pdf [file supp_db12-1345_DB121345SupplementaryData.pdf]
